# Supplementary material for: Sideroflexin 4 affects Fe-S cluster biogenesis, iron metabolism, mitochondrial respiration and heme biosynthetic enzymes
Source: PubMed Central journal article supplement (PMC6928202; doi:10.1038/s41598-019-55907-z), 2019-12-23
Supplement: 41598_2019_55907_MOESM1_ESM.pdf [file 41598_2019_55907_MOESM1_ESM.pdf]

**Sideroflexin 4 affects Fe-S cluster biogenesis, iron metabolism, mitochondrial respiration and heme biosynthetic enzymes.**

Bibbin T. Paul<sup>1</sup>, Lia Tesfay<sup>1</sup>, C.R. Winkler<sup>2</sup>, Frank M. Torti<sup>3</sup>, Suzy V. Torti<sup>1</sup>

<sup>1</sup>Department of Molecular Biology and Biophysics, and <sup>3</sup>Department of Medicine, University of Connecticut Health Center, Farmington CT 06030; <sup>2</sup>Institute for Critical Technology and Applied Science, Nanoscale Characterization and Fabrication Laboratory, Virginia Tech, Blacksburg, VA, 24061, U.S.A

Corresponding author:

Suzy V. Torti  
Department of Molecular Biology and Biophysics  
University of Connecticut Health Center  
Farmington CT 06030  
Email: storti@uchc.edu  
Phone: 860-679-6503  
FAX: 860-679-3408

| Target Gene |         | Target Sequence (5'-3')        |
|-------------|---------|--------------------------------|
| FECH        | Forward | TGG CAC CAT TCA TCG CCA AA     |
|             | Reverse | GAT GGA CGT ACC GAA ATC CAA T  |
| SDHB        | Forward | GAC ACC AAC CTC AAT AAG GTC TC |
|             | Reverse | GGC TCA ATG GAT TTG TAC TGT GC |
| ALAS2       | Forward | TGT CCG TCT GGT GTA GTA ATG A  |
|             | Reverse | GCT CAA GCT CCA CAT GAA ACT    |
| POLD1       | Forward | CAG TGC CAA GGT GGT GTA TGG    |
|             | Reverse | CTT GCT GAT AAG CAG GTA TGG G  |
| PPAT        | Forward | AGC ACC CAC AGC ATA CTC C      |
|             | Reverse | ACA CTG GAA TAA GAC GAC CAA TG |
| ACO2        | Forward | CCC TACAGC CTA CTG GTG ACT     |
|             | Reverse | TGT ACT CGT TGG GCTCAA AGT     |

**Table 1:** List of qPCR primers used.

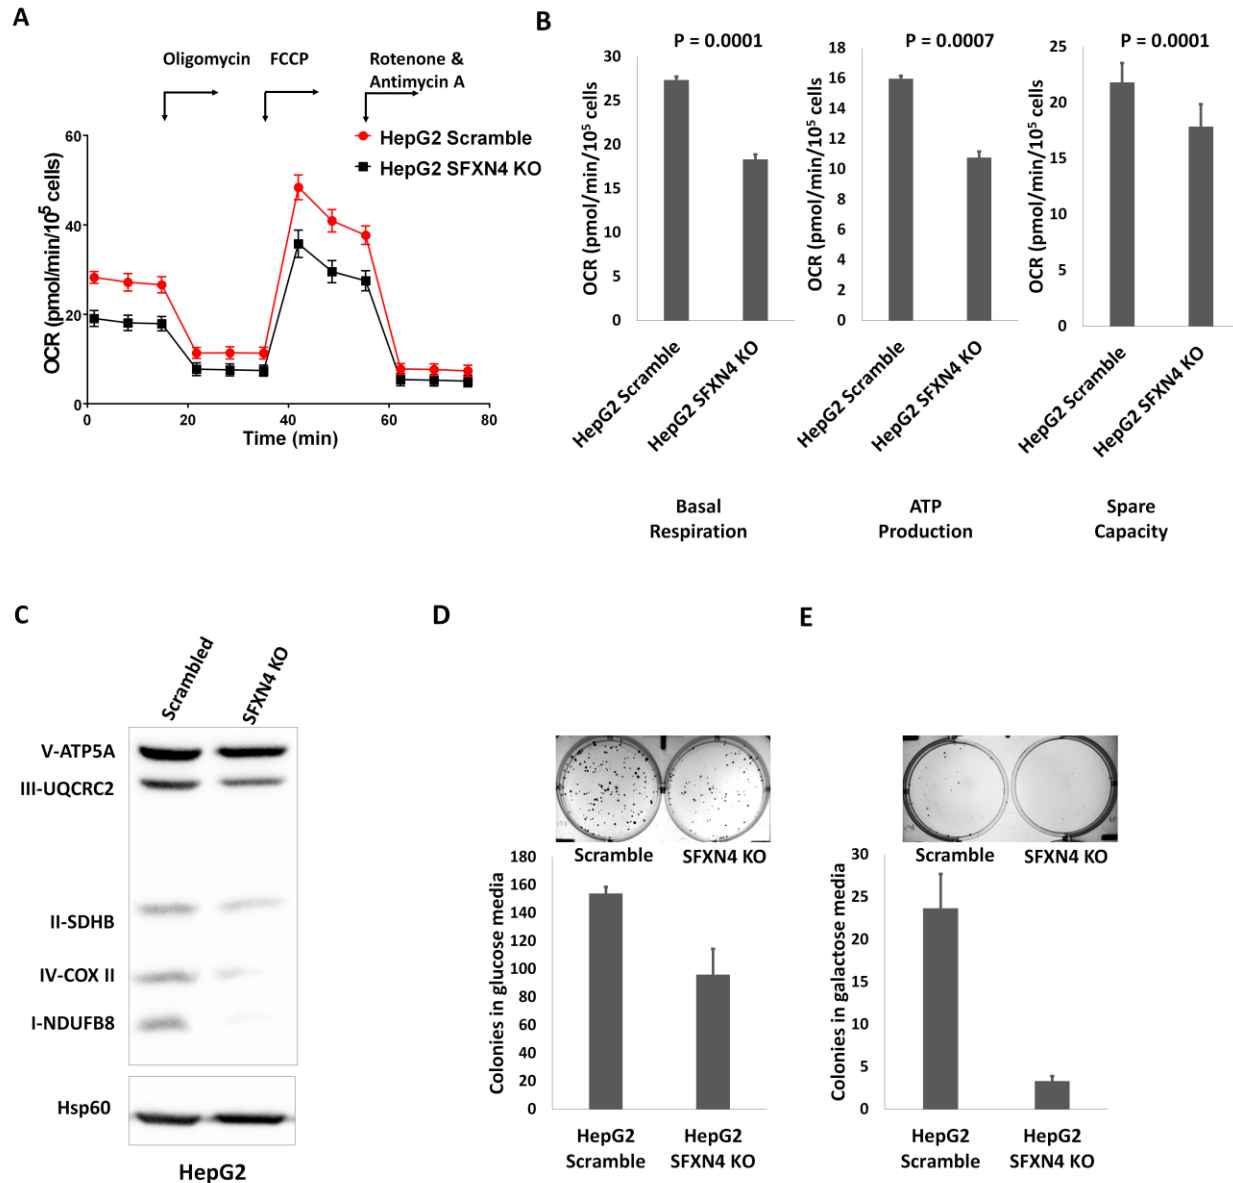

**Supplementary Figure 1: SFXN4 knockout attenuates mitochondrial respiration and affects the steady state of level of respiratory complex proteins in HepG2 cells.**

A) Changes in oxygen consumption rate in response to treatment with indicated metabolic inhibitors in HepG2 (Scramble/SFXN4 KO) cells. B) Basal respiration, mitochondrial ATP production and spare capacity were quantified in 8 replicate experiments (means and standard deviation). C) Immunoblot showing the levels of labile subunits from each of the five mitochondrial respiratory complexes in HepG2 (Scramble/SFXN4 KO) cells. D) Colony formation of HepG2 (Scramble/SFXN4 KO) cells in growth media with glucose. E) Colony formation of HepG2 (Scramble/SFXN4 KO) cells in growth media with galactose substituted for glucose. Images are representative of three independent experiments.

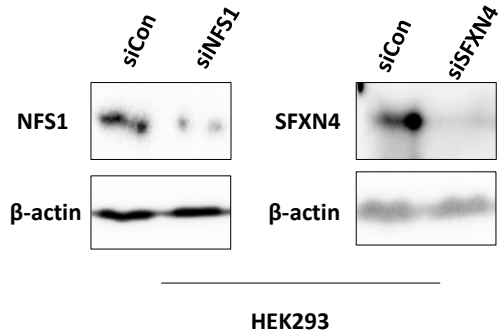

**Supplementary Figure 2: Efficient knockdown of SFXN4 and NFS1 in HEK293 cells.** Western blot of indicated proteins in HEK293 (siControl/siSFXN4) cells.

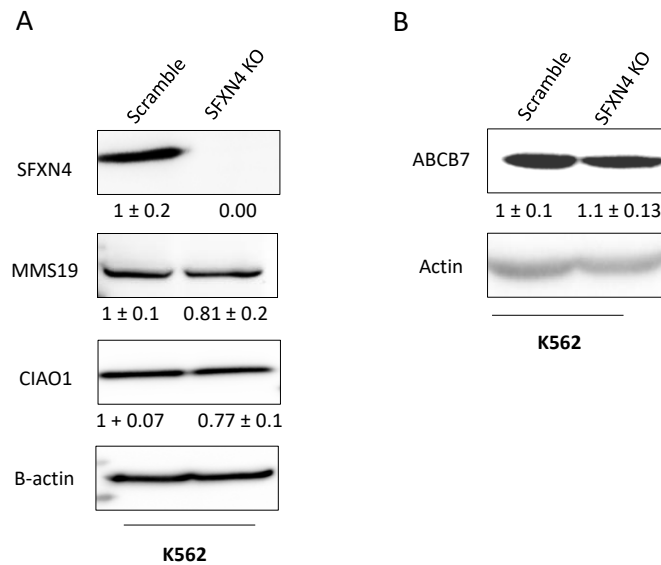

**Supplementary Figure 3: SFXN4 knockout does not substantially alter the protein levels of CIA targeting complex proteins.** A) Western blot of MMS19 and CIAO1, components of a multiprotein targeting complex that mediates the incorporation of iron-sulfur cluster into various cytosolic and nuclear apoproteins. Differences were not statistically significant,  $p > 0.05$ . B) Western blot of ABCB7, the protein thought to transport Fe-S clusters to the cytosol.

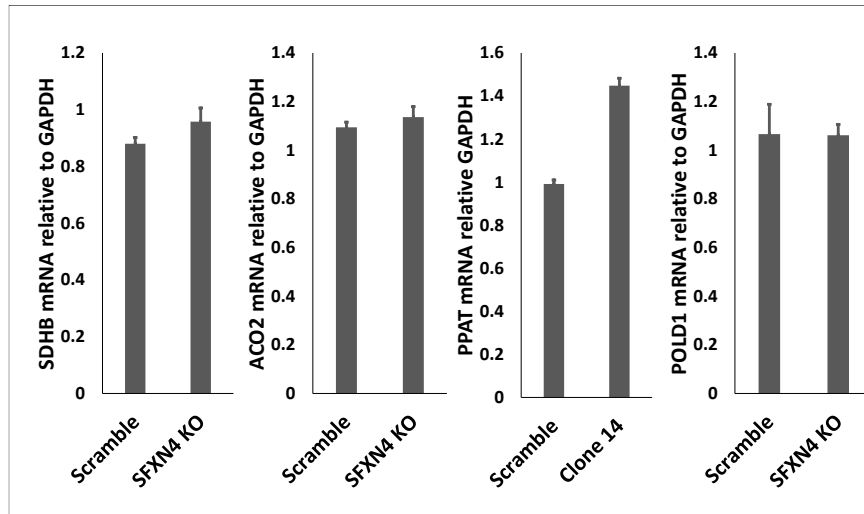

**Supplementary Figure 4: SFXN4 knockout does not decrease mRNA levels of Fe-S proteins.** mRNA levels of SDHB, ACO2, PPAT and POLD1 in K562 (Scramble/ SFXN4 KO) cells as measured by qRT-PCR.

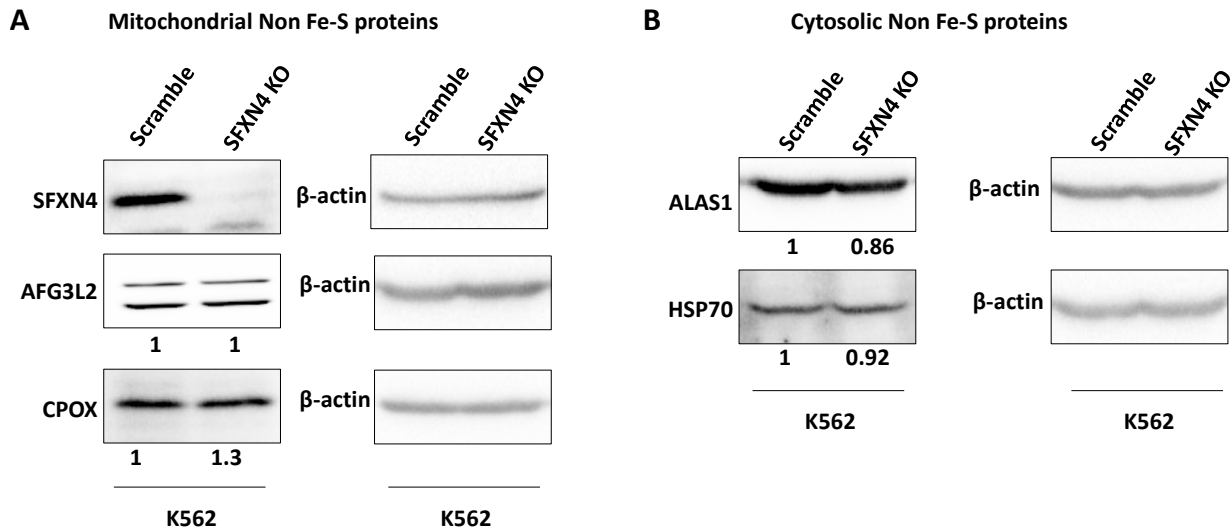

**Supplementary Figure 5: SFXN4 knockout does not change levels of mitochondrial or cytosolic non Fe-S containing proteins.** The mitochondrial proteins AFG3L2 and CPOX and the cytosolic proteins ALAS1 and HSP70 were measured in K562 scramble and SFXN4 knockout cells by western blotting.

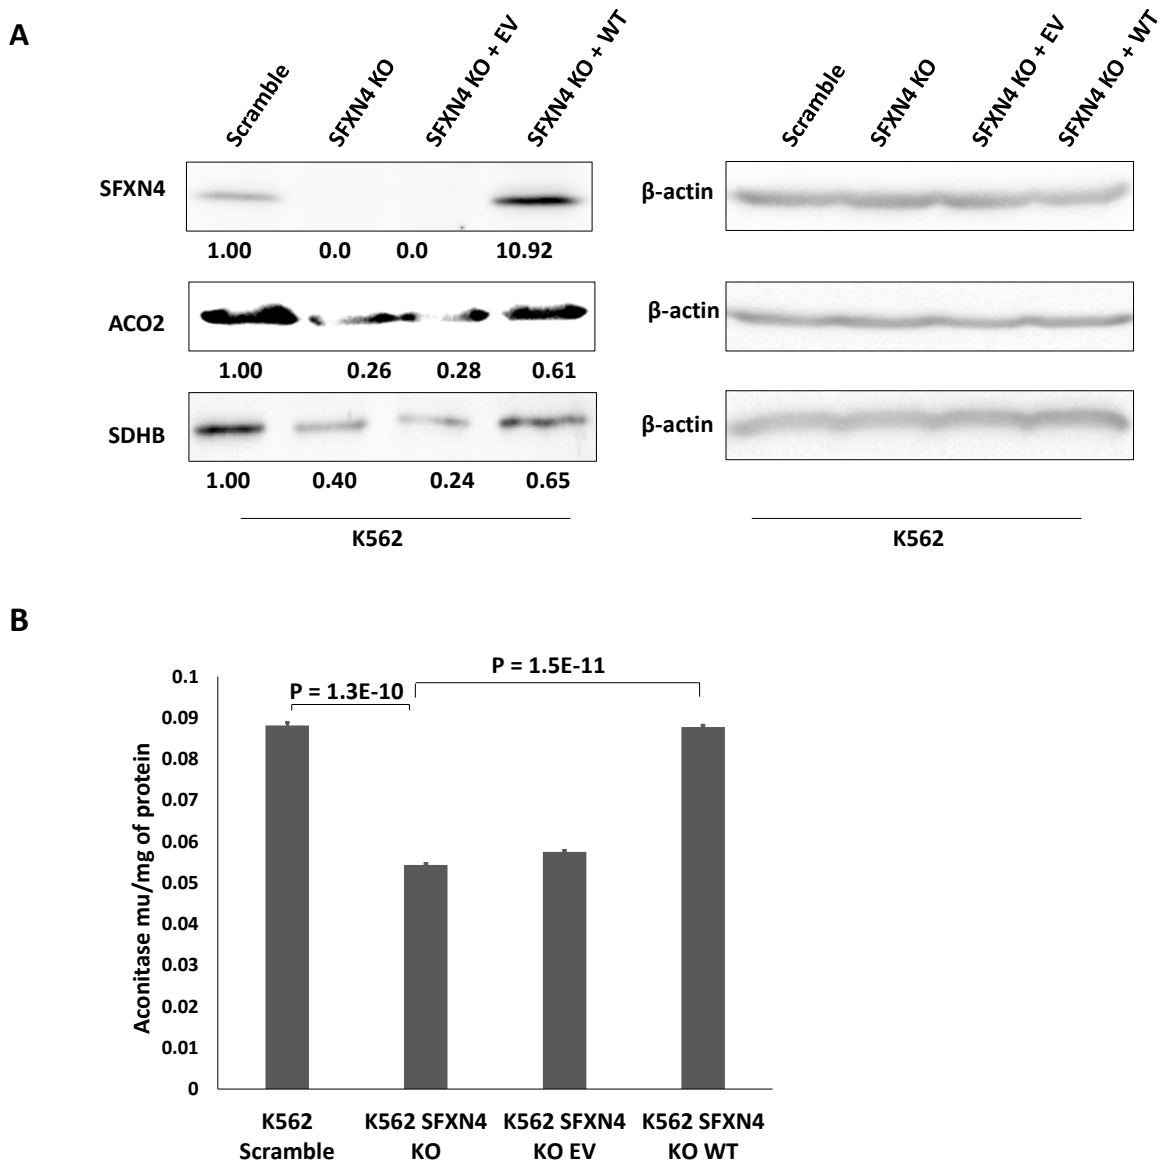

**Supplementary Figure 6: Transient reintroduction of SFXN4 in SFXN4 KO cells restores the activity and stability of Fe-S cluster proteins.** A) Immunoblot showing the levels of SFXN4, ACO2, and SDHB in K562 cells (scramble, SFXN4 KO, SFXN4 KO cells overexpressing empty vector (EV) and SFXN4 KO cells overexpressing wild type (WT) SFXN4). B) Cytosolic aconitase activity in scramble, SFXN4 KO, SFXN4 KO EV and SFXN4 KO WT K562 cells.

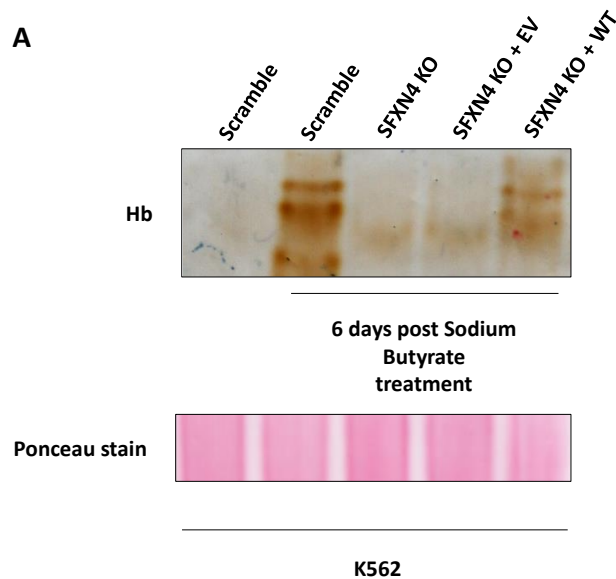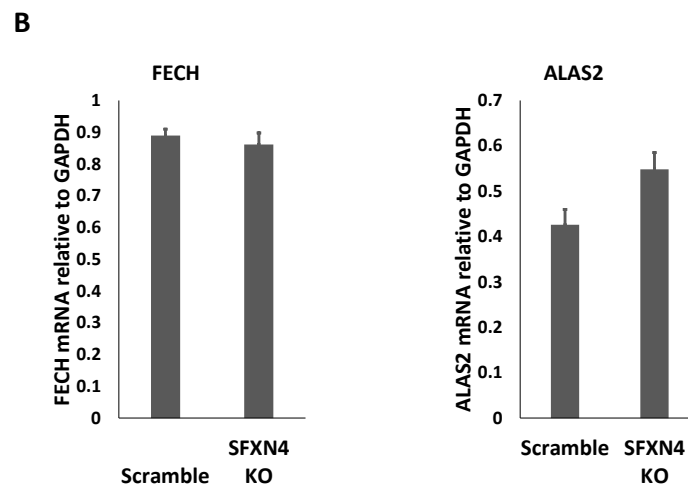

**Supplementary Figure 7: Reintroduction of SFXN4 in SFXN4 KO cells restores hemoglobinization and SFXN4 knockout does not decrease mRNA levels of FECH or ALAS2 in K562 cells.** A) Hemoglobin in differentiated K562 (scramble, SFXN4 KO, SFXN4 KO EV and SFXN4 KO WT) cell at 6 days post induction of differentiation with sodium butyrate. B) mRNA was quantified by qRT-PCR and normalized to GAPDH. Means and standard deviations of triplicate determinations.
